# Supplementary material
Source: Springer Nature journal article supplement (https://www.springermedizin.de/resource/supplementary/13063_2012_1216_MOESM1_ESM.pdf/9619982)
Supplement: MOESM1 [file 9619982]

Screening for eligibility:

- Either gender (18 - 74 years)
- Treated or untreated arterial hypertension (office + day-time ambulatory BP)
- Metabolic syndrome (ATP-III)

Patient informed consent obtained

Randomization  
(n=252)

HBPT  
(n=168)

CM  
(n=84)

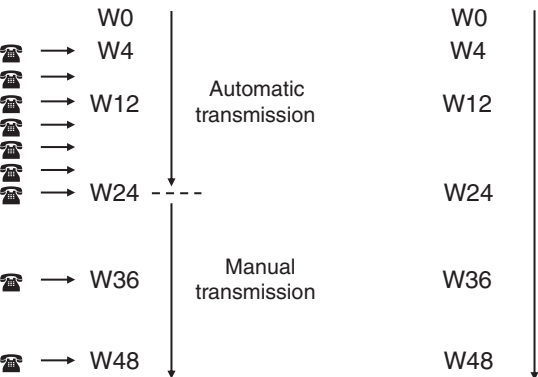

Primary end-point: rate of day-time blood pressure normalization (<135/85 mmHg)
